# Supplementary material
Source: PubMed Central journal article supplement (PMC3166489)
Supplement: adna0202_0043SD1.pdf [file adna0202_0043SD1.pdf]

## SUPPORTING INFORMATION

### Noncovalent Binding and Fluorogenic Response of Cyanine Dyes to DNA Homoquadruplex and PNA-DNA Heteroquadruplex Structures

Halimatu S. Mohammed<sup>†</sup>, Junriz O. Delos Santos<sup>†</sup> and Bruce A. Armitage<sup>\*</sup>

Department of Chemistry and Center for Nucleic Acids Science and Technology, Carnegie Mellon University, 4400 Fifth Avenue, Pittsburgh, PA 15213

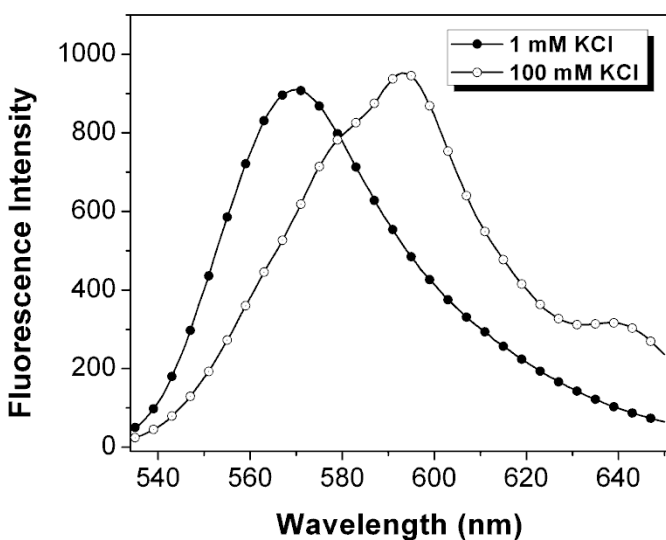

**Figure S1.** Effect of KCl on the fluorescence emission spectrum of 1.0 μM β-Me-DiSC<sub>1</sub>(3) in the presence 0.5 μM Myc19 DNA quadruplex. Samples were excited at 520 nm.
